# Supplementary material for: DNA methylation age is associated with mortality in a longitudinal Danish twin study
Source: PubMed Central journal article supplement (PMC4717264; doi:10.1111/acel.12421), 2015-11-17
Supplement: ACEL-15-149-s001.pdf [file ACEL-15-149-s001.pdf]

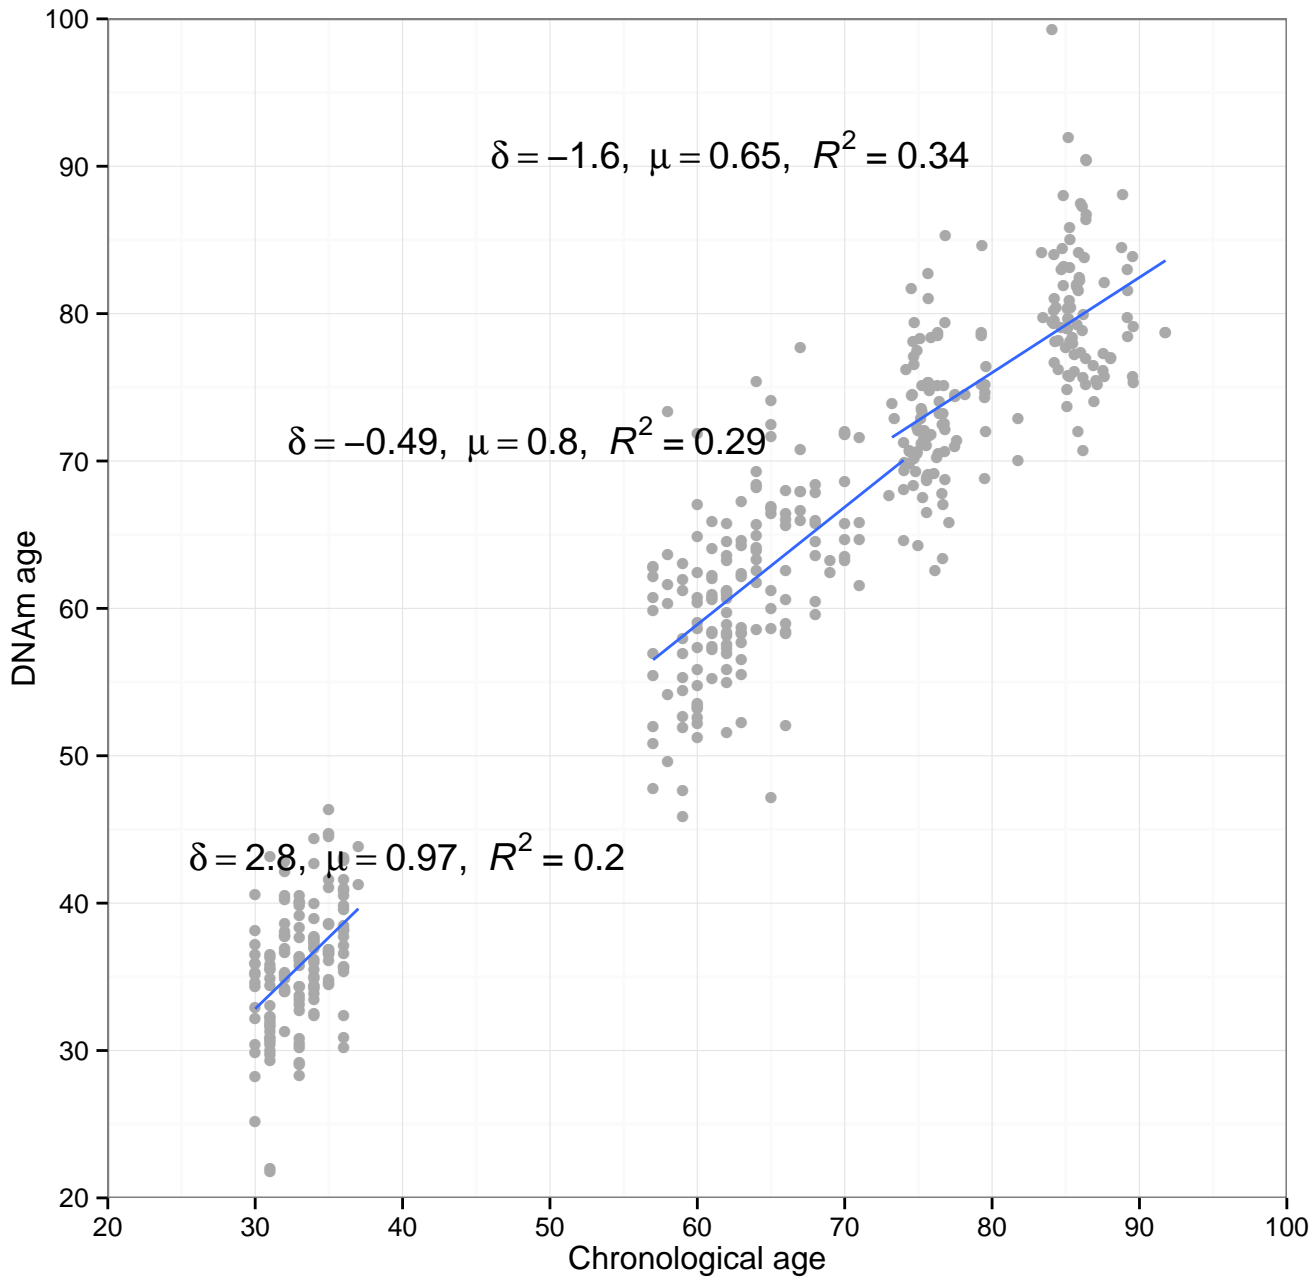

**Figure S1: Horvath's DNAm age against chronological age separated into young, middle-aged and old cohorts.**

We separately regressed DNAm age onto chronological age for the young and middle-aged cross-sectional age groups as well as for the longitudinal sample of oldest-olds to estimate two parameters:  $\delta$ , or intercept, which gives the average difference between DNAm and chronological age, and so indexes whether there is systematic over- or under-prediction of age. Further,  $\mu$  or slope gives the expected increase in DNAm age for every year increase in chronological age.  $R^2$  denotes the square of the correlation for the sub-groups.
